# Supplementary material for: TAL effector driven induction of a SWEET gene confers susceptibility to bacterial blight of cotton
Source: PubMed Central journal article supplement (PMC5458083; doi:10.1038/ncomms15588), 2017-05-24
Supplement: ncomms15588-s1.pdf [file ncomms15588-s1.pdf]

1  
2

**Avrb6**

5' -MDP I R S R T P S P A R E L L P G P Q P D G V Q P T A D R G V S P P A G G P L D G L P A R R T M S R T R L P S P P A P S P A F S A G S F S  
D L L R Q F D P S L F N T S L F D S L P P F G A H H T E A A T G E W D E V Q S G L R A A D A P P P T M R V A V T A A R P P R A K P A P R R R  
A A Q P S D A S P A A Q V D L R T L G Y S Q Q Q E K I K P K V R S T V A Q H H E A L V G H G F T H A H I V A L S Q H P A A L G T V A V K Y  
Q D M I A A L P E A T H E A I V G V G K Q W S G A R A L E A L L T V A G E L R G P P L Q L D T G Q L L K I A K R G G V T A V E A V H A W R N  
A L T G A P L N L T P E Q V V A I A S H D G G K Q A L E T V Q R L L P V L C Q A H G L T P E Q V V A I A S N I G G K Q A L E T V Q A L L P V  
L C Q A H G L T P E Q V V A I A S N G G K Q A L E T V Q R L L P V L C Q A H G L T P E Q V V A I A S H D G G K Q A L E T V Q R L L P V L C  
Q A H G L T P E Q V V A I A S H D G G K Q A L E T V Q R L L P V L C Q A H G L T P E Q V V A I A S N I G G K Q A L E T V Q R L L P V L C Q A  
H G L P P E Q V V A I A S H D G G K Q A L E T V Q R L L P V L C Q A H G L T L D Q V V A I A S N I G G K Q A L E T V Q R L L P V L C Q A H G  
L T P Q Q V V A I A S N S G G K Q A L E T V Q R L L P V L C Q A H G L T P E Q V V A I A S H D G G K Q A L E T V Q R L L P V L C Q A H G L T  
P E Q V V A I A S H D G G K Q A L E T V Q R L L P V L C Q A H G L T P E Q V V A I A S H D G G K Q A L E T V Q R L L P V L C Q A H G L T P A  
Q V V A I A S N N G G K Q A L E T V Q R L L P V L C Q A H G L T P E Q V V A I A S N G G R P A L E S I V A Q L S R P D P A L A A L T N D H  
L V A L A C L G G R P A L D A V K K G L P H A P A L I K R T N R R I P E R T S H R V A D H A Q V V R V L G F F Q C H S H P A Q A F D D A M T  
Q F G M S R H G L V Q L F R R V G V T E L E A R S G T L P P A S Q R W D R I L Q A S G M K R A K P S P T S T Q T P D Q A S L H A F A D S L E  
R D L D A P S P M H E G D Q T R A S S R K R S R S D R A V T G P S A Q Q S F E V R V P E Q R D A L H L P L S W R V K R P R T S I G G G L P D  
P G T P T A A D L A A S S T V M R E Q D E D P F A G A A D D F P A F N E E E L A W L M E L L P Q - 3'

3  
4  
5  
6  
7  
8  
9  
10  
11  
12  
13  
14  
15

**Supplementary Figure 1. Avrb6 amino acid sequence.** The first amino acid of each TAL effector repeat is highlighted in blue. The RVD of each repeat is underlined.

16  
17  
18  
19

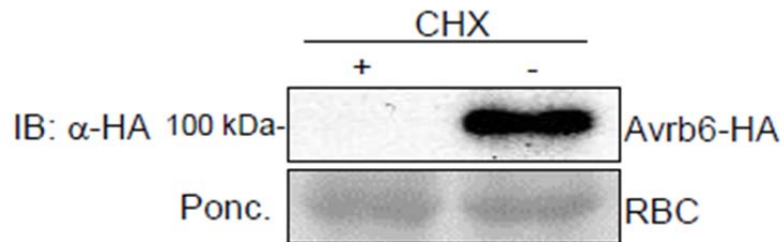

20  
21  
22  
23  
24  
25  
26  
27  
28  
29  
30  
31  
32  
33  
34  
35  
36  
37  
38  
39

**Supplementary Figure 2. Cycloheximide (CHX) suppresses Avrb6 protein synthesis in a cotton transient assay.** Cotyledons from two-week-old Ac44E cotton were infiltrated with *Agrobacterium* carrying *35S::avrb6*-HA at  $OD_{600} = 0.6$  with or without 50 $\mu$ M CHX. Tissues were harvested 4 dpi and subjected to immunoblotting with  $\alpha$ -HA antibody (top panel). Ponceau S staining (Ponc) for RuBisCo (RBC) served as the protein loading control (bottom panel).

40

|                    | EBE                                           |
|--------------------|-----------------------------------------------|
| <i>pGhSWEET10D</i> | TTGTCGTTTCCTCATCCCCAGCCCGTTCTCCTCGGC          |
| <i>pGh067700</i>   | TATCTCCTCCCTCCTCCCCACCC <u>C</u> ATAATTTCTTAA |
| <i>pGhKBS1</i>     | GTCATTTTCAATCACCACCACCATAAAATGGAAAA           |
| <i>pGhMDR1</i>     | CTCTTTCAGCATCATCCCCATCCCCTACTTTTTATT          |
| <i>pGhHLH1</i>     | ATCCATGAAACTCATCCACATCACATTTCTTTCTCC          |

41

42

43 **Supplementary Figure 3. Avrb6 EBEs of candidate genes.** Avrb6 EBE of each candidate gene  
44 is underlined. The sequenced EBE of *Gh067700* bears a deleted nucleotide (indicated with the  
45 “C” highlighted in blue) when compared to the predicted Avrb6 EBE.

46

47

48

49

50

51

52

53

54

55

56

57

58

59

60

61

62

63

64

65

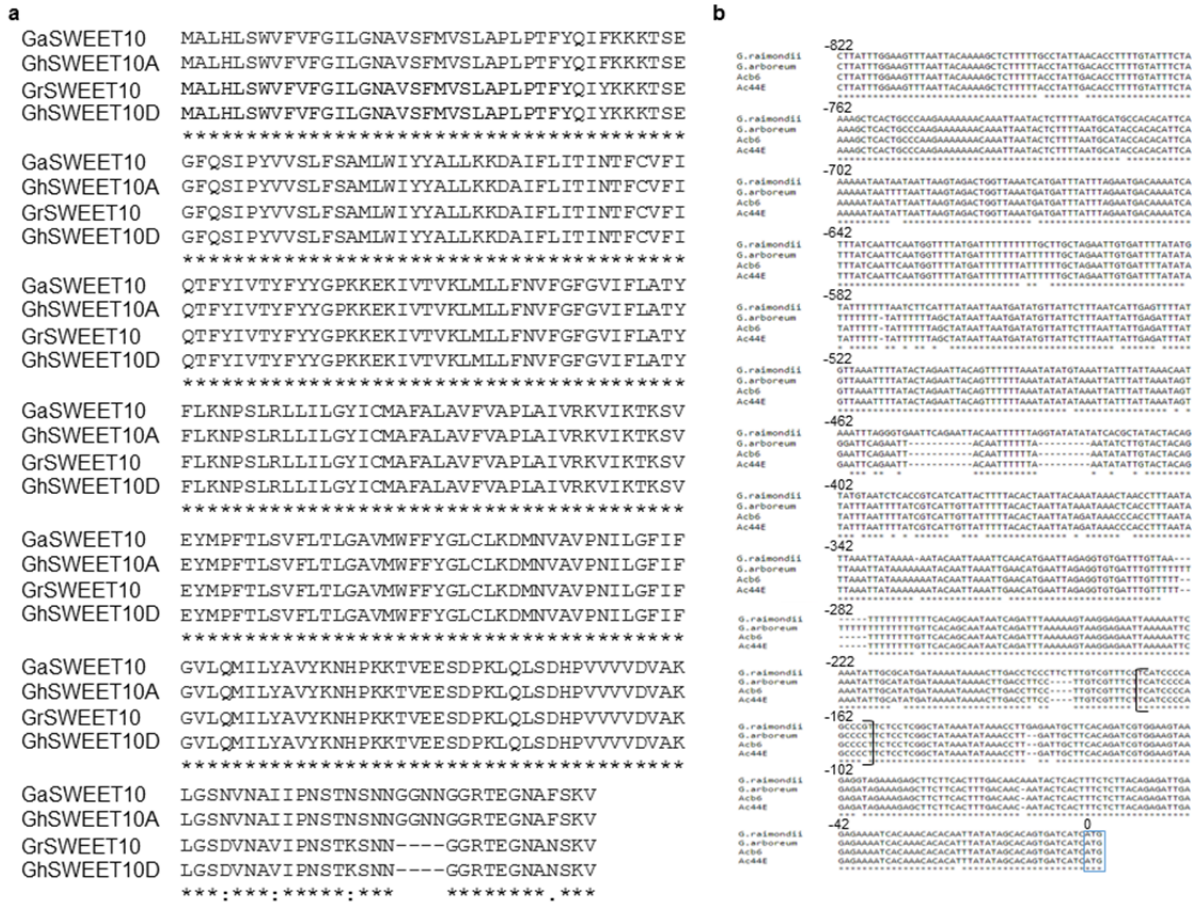

67

68

69 **Supplementary Figure 4. Sequence alignment of SWEET10 coding sequences and**  
 70 **promoters from *G. raimondii*, *G. arboreum*, and *G. hirsutum*.** Alignment was performed with  
 71 the protein coding sequences (A) and with the promoters using the Clustal Omega website  
 72 (<http://www.ebi.ac.uk/Tools/msa/clustalo/>) (B) with a hierarchical clustering approach. In (B),  
 73 Avr6 EBE is highlighted with a black bracket. ATG is highlighted with a white box. The  
 74 promoter sequences of *pGhSWEET10A* from A-subgenome in Ac44E and Acb6 are shown here.

75

76

VIGS-*GhCLA1*   VIGS-Ctrl   VIGS-*GhSWEET10*

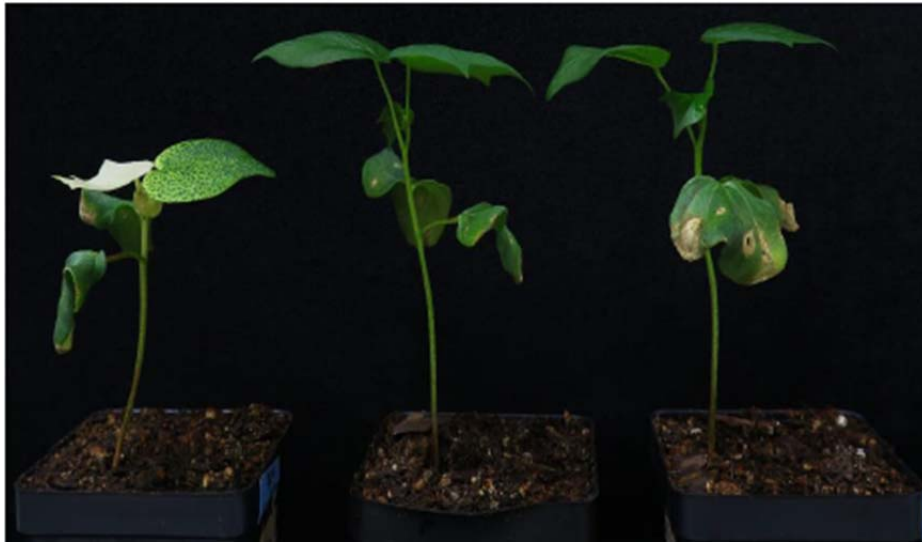

77

78

79 **Supplementary Figure 5. VIGS-*GhSWEET10* did not affect cotton seedling growth.** Pictures  
80 were taken at three weeks after inoculation. VIGS-*GhCLA1* is a visual marker for VIGS  
81 efficiency.

82

83

84

85

86

87

88

89

90

91

92

93

94

95

96

97

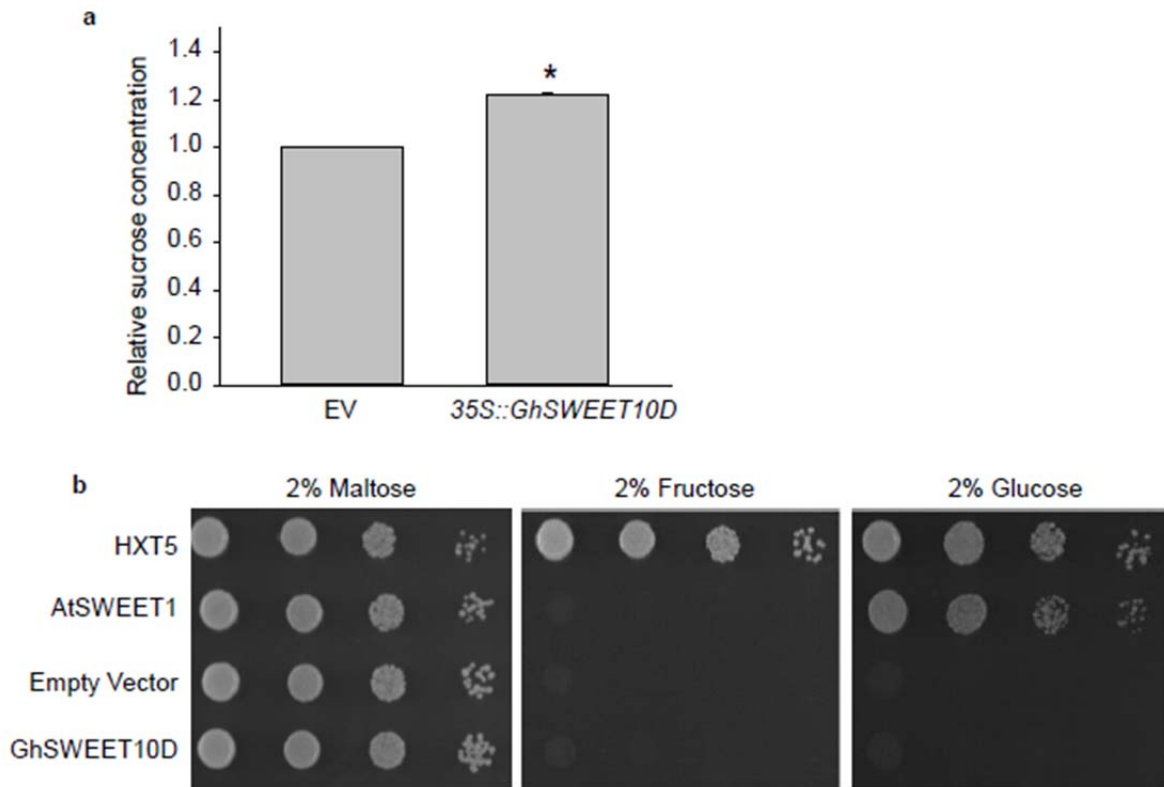

99

100 **Supplementary Figure 6. GhSWEET10D sugar transport activity in *N. benthamiana* and**

101 **yeast.** (A) Expression of *GhSWEET10D* resulted in higher sucrose concentration in apoplasts of  
 102 *N. benthamiana* leaves. *Agrobacterium* strain carrying *35S::GhSWEET10D* or an empty vector  
 103 control (EV) was inoculated into *N. benthamiana* leaves. The sucrose content was normalized to  
 104 a ratio relative to the EV. Error bar is SD and asterisk indicates significant difference using two-  
 105 tailed t-test ( $p < 0.05$ ). The experiment was repeated twice. (B) GhSWEET10D does not  
 106 complement yeast EBY4000 mutant, a hexose transport-deficient strain. The yeast was grown on  
 107 the medium supplemented with 2% glucose or 2% fructose as the sole carbon source or 2%  
 108 maltose as control. HXT5 from yeast and AtSWEET1 from Arabidopsis served as positive  
 109 controls and empty vector served as a negative control.

110

111

112

113

114  
115  
116

| Clade I     |            | Clade II    |            | Clade III   |             | Clade IV    |             |
|-------------|------------|-------------|------------|-------------|-------------|-------------|-------------|
| Gene ID     | Gene Name  | Gene ID     | Gene Name  | Gene ID     | Gene Name   | Gene ID     | Gene Name   |
| Gh_A02G0694 | GhSWEET1aA | Gh_A05G3128 | GhSWEET4A  | Gh_A08G0663 | GhSWEET9aA  | Gh_A11G2442 | GhSWEET16aA |
| Gh_D02G0740 | GhSWEET1aD | Gh_D04G0509 | GhSWEET4D  | Gh_D08G2730 | GhSWEET9aD  | Gh_D11G2760 | GhSWEET16aD |
| Gh_A02G1806 | GhSWEET1bA | Gh_A05G3127 | GhSWEET5aA | Gh_A07G0421 | GhSWEET9bA  | Gh_A13G1540 | GhSWEET16bA |
| Gh_D03G1717 | GhSWEET1bD | Gh_D04G0510 | GhSWEET5aD | Gh_D07G0486 | GhSWEET9bD  | Gh_D13G1875 | GhSWEET16bD |
| Gh_A11G3285 | GhSWEET2aA | Gh_A07G0535 | GhSWEET5bA | Gh_A12G1747 | GhSWEET10A  | Gh_A10G1468 | GhSWEET17aA |
| Gh_D11G2975 | GhSWEET2aD | Gh_D07G0604 | GhSWEET5bD | Gh_D12G1898 | GhSWEET10D  | Gh_D10G1709 | GhSWEET17aD |
| Gh_D10G0303 | GhSWEET2bD | Gh_A12G2152 | GhSWEET6A  | Gh_A03G0461 | GhSWEET11A  | Gh_D02G0542 | GhSWEET17bD |
| Gh_A11G2655 | GhSWEET3A  | Gh_D12G2328 | GhSWEET6D  | Gh_D03G1078 | GhSWEET11D  | Gh_D13G1146 | GhSWEET17cD |
| Gh_D12G2692 | GhSWEET3D  | Gh_A02G0950 | GhSWEET7A  | Gh_A07G0423 | GhSWEET12aA | Gh_A13G1434 | GhSWEET18A  |
|             |            | Gh_D03G0812 | GhSWEET7D  | Gh_D07G0487 | GhSWEET12aD | Gh_D13G1763 | GhSWEET18D  |
|             |            | Gh_A13G0907 | GhSWEET8aA | Gh_A07G0422 | GhSWEET12bA |             |             |
|             |            | Gh_D13G1148 | GhSWEET8aD | Gh_A11G0347 | GhSWEET13A  |             |             |
|             |            | Gh_A11G2446 | GhSWEET8bA | Gh_D11G0404 | GhSWEET13D  |             |             |
|             |            | Gh_D11G2763 | GhSWEET8bD | Gh_A04G0861 | GhSWEET14aA |             |             |
|             |            |             |            | Gh_D04G1360 | GhSWEET14aD |             |             |
|             |            |             |            | Gh_D02G1767 | GhSWEET14bD |             |             |
|             |            |             |            | Gh_A01G0160 | GhSWEET15A  |             |             |
|             |            |             |            | Gh_D01G0202 | GhSWEET15D  |             |             |

117  
118  
119  
120  
121  
122  
123  
124  
125  
126  
127  
128  
129  
130  
131

**Supplementary Figure 7. Gene IDs and corresponding names of the cotton GhSWEET family.** Tables are separated by different clades of GhSWEET family.







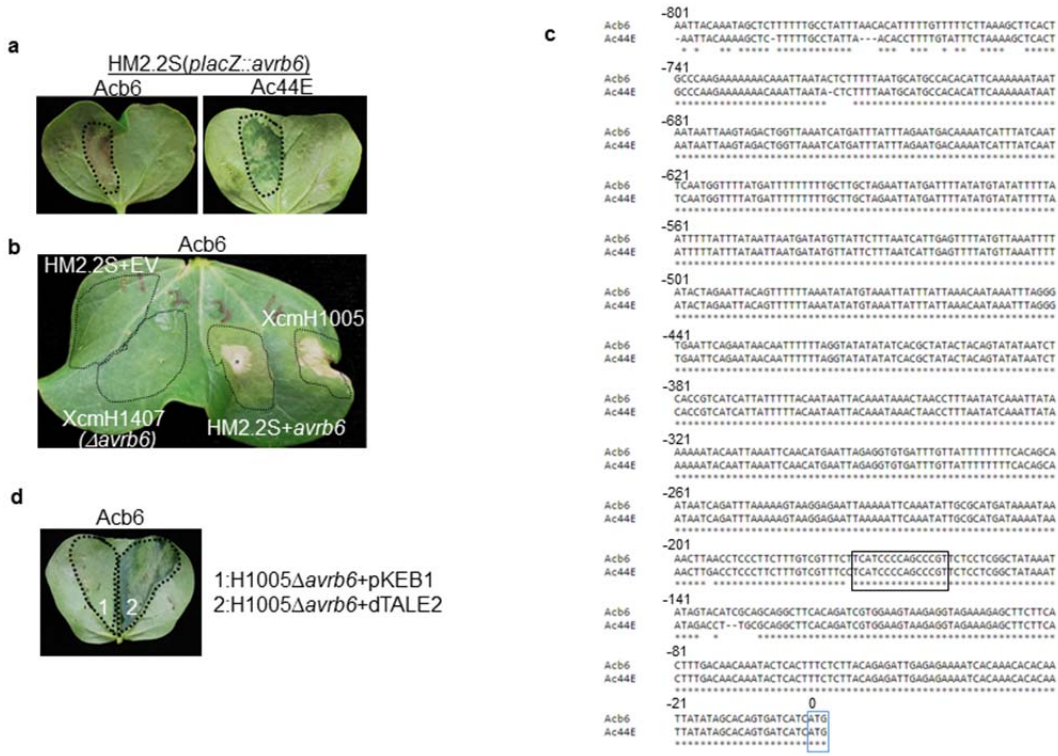

148

149

150 **Supplementary Figure 9. Differential responses of Avr6 in Ac44E and Acb6.** (A) Avr6

151 causes water-soaking on Ac44E, but HR on Acb6. Cotyledons of two-week-old plants were

152 syringe-inoculated with *Xcm*HM2.2S (*placZ::avr6*) at OD<sub>600</sub> = 0.1. Pictures were taken at 4 dpi.

153 (B) Strains carrying *avr6*, *Xcm*H1005 and HM2.2S+*avr6* cause HR in Acb6. (C) Sequence

154 alignment of the *GhSWEET10D* promoter in Ac44E and Acb6. Alignment was performed using

155 the Clustal Omega website (<http://www.ebi.ac.uk/Tools/msa/clustalo/>) with a hierarchical

156 clustering approach. Avr6 EBE is highlighted with a black box. ATG is highlighted with a red

157 box. (D) dTALE2 causes water-soaking on Acb6. Cotyledons of two-week-old plants were

158 syringe-inoculated with *Xcm*H1005 $\Delta$ *avr6* carrying dTALE2 or pKEB1 (empty vector) at OD<sub>600</sub>

159 = 0.1. Pictures were taken at 4 dpi.

160

161

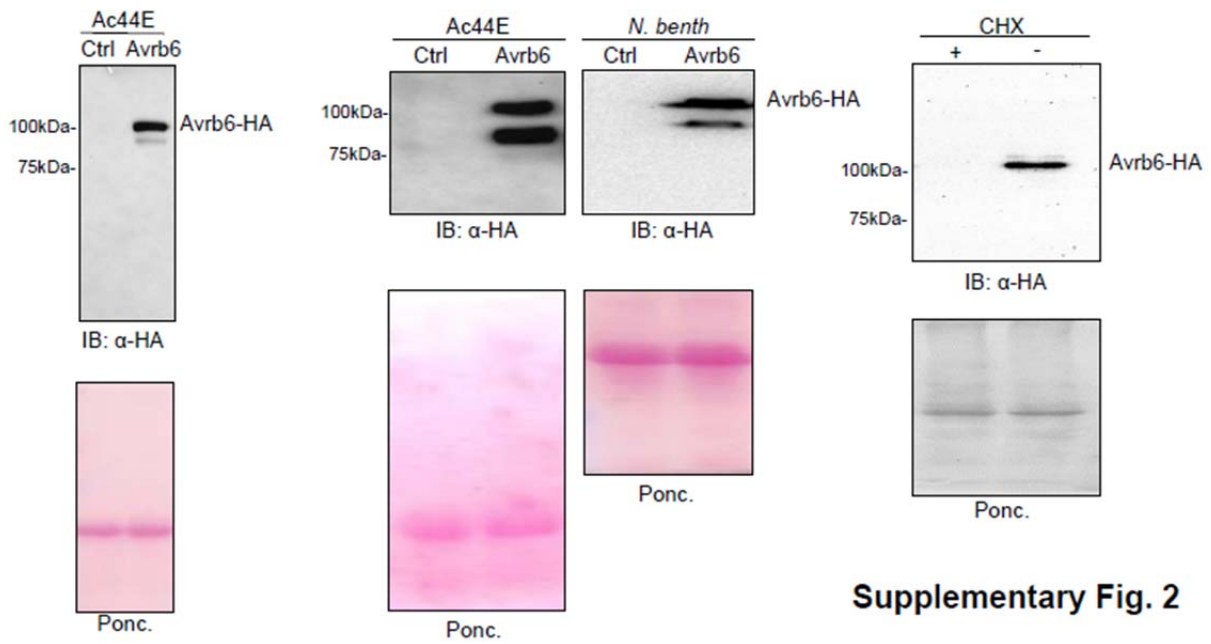

Figure 2b

Figure 2c

Supplementary Fig. 2

165 **Supplementary Figure 10. Full blots of Figure 2b, 2c, and Supplementary Fig. 2.**

175 **Supplementary Table 1. Progressive MAUVE on pXcmH and pXcmN**

| pXcmH_left end | pXcmH_right end | pXcmN_left end | pXcmN_right end |
|----------------|-----------------|----------------|-----------------|
| 79681          | 79764           | 9909           | 9992            |
| -3939          | -7800           | 10470          | 14331           |
| -3463          | -3935           | 14391          | 14877           |
| 16064          | 25400           | 16064          | 25399           |
| 25467          | 25611           | 25473          | 25616           |
| 59530          | 63360           | 35092          | 38921           |
| 7801           | 16063           | 0              | 0               |
| 25401          | 25466           | 0              | 0               |
| 25612          | 59529           | 0              | 0               |
| 63361          | 79680           | 0              | 0               |
| 0              | 0               | 9993           | 10469           |
| 0              | 0               | 14332          | 14390           |
| 0              | 0               | 14878          | 16063           |
| 0              | 0               | 25400          | 25472           |
| 0              | 0               | 25617          | 35091           |

176

177 **Supplementary Table 2. RVD sequences and AnnoTALE names of XcmH1005 and**  
 178 **XcmN1003 TAL effectors.**

| Annotated Name                  | Gene coordinates | RVD Sequence                                                      | AnnoTALE Name      | Comments on coding sequence |
|---------------------------------|------------------|-------------------------------------------------------------------|--------------------|-----------------------------|
|                                 |                  | 1 2 3 4 5 6 7 8 9 10<br>11 12 13 14 15 16 17 18 19<br>20 21 22 23 |                    |                             |
| <b>XcmH1005 chromosome</b>      |                  |                                                                   |                    |                             |
| AvrB5                           | 193705..196791   | NI NS HD NI NS NS NS NS HD<br>NI NS HD HD HD                      | TalDZ1<br>XcmH1005 |                             |
| AvrB104                         | 197283..200771   | NI HD HD NS HD NG HD HD HD<br>NI NI NI NN NI NG NG N* NG          | TalDX1<br>XcmH1005 |                             |
| PthN2                           | 228643..231927   | NI NG NI NI NS NI NN NI N* NN<br>HD NN NS NG N* NN                | TalEG1<br>XcmH1005 |                             |
| AvrBn                           | 2720814..2723696 | NI NG NI HD HD HD NG HD<br>HD NG NG                               | TalEE1<br>XcmH1005 |                             |
| AvrB103                         | 2748215..2751499 | HD NI NG NI NI NI NG NG NS<br>NG HD HD NI HD N* NN                | TalEB2<br>XcmH1005 |                             |
| Tal6 <sub>XcmH1005</sub>        | 4979648..4982734 | NI NG NI NI NI NG HD HD NG<br>NI HD NI NG NG                      | TalED1<br>XcmH1005 |                             |
| <b>XcmH1005 plasmid (pXcmH)</b> |                  |                                                                   |                    |                             |
| AvrB4                           | 8056..11649      | NI NG NI NI NS NG NI HD NI NS<br>NS HD HD HD NI NI HD HD NG       | TalDY1<br>XcmH1005 |                             |

| Annotated Name                  | Gene coordinates | RVD Sequence                                                               | AnnoTALE Name      | Comments on coding sequence                                          |
|---------------------------------|------------------|----------------------------------------------------------------------------|--------------------|----------------------------------------------------------------------|
|                                 |                  | 1 2 3 4 5 6 7 8 9 10<br>11 12 13 14 15 16 17 18 19<br>20 21 22 23          |                    |                                                                      |
| Avrb6                           | 12430..15516     | HD NI NG HD HD NI HD NI NS<br>HD HD HD NN NG                               | TalEC1<br>XcmH1005 |                                                                      |
| AvrB101                         | 32633..36637     | HD NG NS NG NI NI NS NG HD<br>NS HD HD NS HD NG NI HD HD<br>NG NS NG HD NG | TalEA1<br>XcmH1005 |                                                                      |
| AvrBIn                          | 39817..43617     | HD NI NG NI NI NI NG NG NS<br>NG HD HD NI HD NS NG NS NG<br>NG NG NG       | TalEB1<br>XcmH1005 |                                                                      |
| AvrB102                         | 50873..54367     | NI NI NI NG HD NG NI HD NI<br>HD NG NS NG HD NG HD NS NG                   | TalDW1<br>XcmH1005 |                                                                      |
| Avrb7                           | 66226..69822     | HD NI NG NI NI NI NS HD HD<br>HD NS HD HD NS NS NG NS NG<br>NG             | TalEF1<br>XcmH1005 |                                                                      |
| <b>XcmN1003 chromosome</b>      |                  |                                                                            |                    |                                                                      |
| Tal1 <sub>XcmN1003</sub>        | 194999..196450   | HD                                                                         | TalCP4<br>XcmN1003 | Only a last, 57 bp (19 aa) repeat; IS element in 3' end              |
| Tal2 <sub>XcmN1003</sub>        | 2354470..2355501 | HD                                                                         | TalCP5<br>XcmN1003 | Integrase insertion in 2 <sup>nd</sup> repeat                        |
| AvrBn                           | 2379939..2382821 | NI NG NI HD HD HD HD NG HD<br>HD NG NG                                     | TalEE2<br>XcmN1003 |                                                                      |
| Tal4 <sub>XcmN1003</sub>        | 2830732..2832598 | NI HD HD NG HD NG NI NS NS<br>HD                                           | TalCC4<br>XcmN1003 | Frameshift deletion at 11 <sup>th</sup> and 12 <sup>th</sup> repeats |
| Tal5 <sub>XcmN1003</sub>        | 4988366..4990750 | HD NG NI NI NG HD HD NG NI<br>HD NI NG NG HD NI                            | TalEI1 XcmN1003    | 4 bp insertion in last repeat                                        |
| <b>XcmN1003 plasmid (pXcmN)</b> |                  |                                                                            |                    |                                                                      |
| PthN'                           | 26436..29081     | NI HD HD NI HD NI NG NI NN<br>HD NI NG N* NN                               | TalEJ2<br>XcmN1003 | Frameshift in 3' end                                                 |
| Tal7 <sub>XcmN1003</sub>        | 42258..45437     | NI HD HD NS NG HD HD N* NN<br>HD NN NS NG N* NN                            | TalEH1<br>XcmN1003 |                                                                      |
| PthN                            | 51889..54969     | NI HD HD NI HD NI NG NI NN<br>HD NI NG N* NN                               | TalEJ1<br>XcmN1003 |                                                                      |
| PthN2                           | 55295..58444     | NI NG NI NI NS NI NN NI N* NN<br>HD NN NS NG N* NN                         | TalEG2<br>XcmN1003 | Repetitive element insertion in 3' end                               |

179

180

181 **Supplementary Table 3. *Xcm* strains and plasmids used in this study.**

182 ***Xcm* strains**

| Strains                                | Relevant characteristics                                                                 | Reference/Source               |
|----------------------------------------|------------------------------------------------------------------------------------------|--------------------------------|
| <i>Xcm</i> H1005                       | Spontaneous Rif <sup>r</sup> derivative of <i>Xcm</i> H                                  | Yang <i>et al.</i> 1994        |
| <i>Xcm</i> N1003                       | Spc <sup>r</sup> , Rif <sup>r</sup> derivative of <i>Xcm</i> N                           | DeFeyter and Gabriel, 1991     |
| <i>Xcm</i> H1407 ( <i>H1005Δavr6</i> ) | <i>avr6::Tn5-gusA</i> , marker exchange mutant of <i>Xcm</i> H1005 ( <i>H1005Δavr6</i> ) | Yang <i>et al.</i> 1994        |
| H1005 ( <i>placZ::avr6</i> )           | <i>Xcm</i> H1005 with pUFR135                                                            | This study                     |
| HM2.2S                                 | Mutant strain of H1005 lacking at least six <i>avr</i> genes                             | Chakrabarty <i>et al.</i> 1997 |
| HM2.2S (vector)                        | HM2.2S with pUFR042                                                                      | This study                     |
| HM2.2S ( <i>avr6</i> )                 | HM2.2S with pUFR127                                                                      | Yang <i>et al.</i> 1996        |
| HM2.2S ( <i>placZ::avr6</i> )          | HM2.2S with pUFR135                                                                      | This study                     |
| HM2.2S+pKEB1                           | HM2.2S with pKEB1                                                                        | This study                     |
| HM2.2S+dTALE1                          | HM2.2S with dTALE targeting <i>GhSWEET10D</i> in pKEB1                                   | This study                     |
| HM2.2S+dTALE2                          | HM2.2S with dTALE targeting <i>GhSWEET10</i> (A&D) in pKEB1                              | This study                     |
| HM2.2S+dTALE3                          | HM2.2S with dTALE targeting <i>GhMDR1</i> in pKEB1                                       | This study                     |
| HM2.2S+dTALE4                          | HM2.2S with dTALE targeting <i>GhKBS1</i> in pKEB1                                       | This study                     |
| <i>Xcm</i> H1005Δ <i>avr6</i> +pKEB1   | <i>Xcm</i> H1005Δ <i>avr6</i> with pKEB1                                                 | This study                     |
| <i>Xcm</i> H1005Δ <i>avr6</i> +dTALE1  | <i>Xcm</i> H1005Δ <i>avr6</i> with dTALE targeting <i>GhSWEET10D</i> in pKEB1            | This study                     |
| <i>Xcm</i> H1005Δ <i>avr6</i> +dTALE2  | <i>Xcm</i> H1005Δ <i>avr6</i> with dTALE targeting <i>GhSWEET10</i> (A&D) in pKEB1       | This study                     |
| <i>Xcm</i> 1                           | Field isolate from Plains, TX                                                            | This study                     |
| <i>Xcm</i> 2                           | Field isolate from Plains, TX                                                            | This study                     |
| <i>Xcm</i> 3                           | Field isolate from Plains, TX                                                            | This study                     |
| <i>Xcm</i> 4                           | Field isolate from Plains, TX                                                            | This study                     |
| <i>Xcm</i> 5                           | Field isolate from Plains, TX                                                            | This study                     |
| <i>Xcm</i> 6                           | Field isolate from Plains, TX                                                            | This study                     |
| <i>Xcm</i> 7                           | Field isolate from Matagorda, TX                                                         | This study                     |
| <i>Xcm</i> 8                           | Field isolate from Lubbock, TX                                                           | This study                     |
| <i>Xcm</i> 9                           | Field isolate from Seminole, TX                                                          | This study                     |

183

184



185 **Plasmids**

| Plasmid     | Relevant characteristics                                                                                             | Reference/Source            |
|-------------|----------------------------------------------------------------------------------------------------------------------|-----------------------------|
| pKEB1       | Low copy, gateway-compatible pUFR047 derivative, Gm <sup>r</sup>                                                     | This study                  |
| pRK2073     | pRK2013 derivative, npt::Tn7, Kms, Sp <sup>r</sup> , Tra <sup>+</sup> , helper plasmid                               | Leong <i>et al.</i> 1982    |
| pUFR042     | IncW, Km <sup>r</sup> , Gm <sup>r</sup> , Mob <sup>+</sup> , lacZα <sup>+</sup> , Par <sup>+</sup>                   | DeFeyter and Gabriel, 1991a |
| pUFR054     | IncP, Tc <sup>r</sup> , Mob <sup>+</sup> , containing methylases <i>XmaI</i> and <i>XmaII</i>                        | DeFeyter and Gabriel, 1991b |
| pUFR127     | 5-kb fragment containing <i>avrb6</i> in pUFR042                                                                     | DeFeyter and Gabriel, 1991a |
| pUFR135     | 2.9- + -0.5-kb <i>BamHI</i> fragments from <i>XcmH</i> containing intact <i>avrb6</i> in pUFR042; <i>lacZ::avrb6</i> | DeFeyter <i>et al.</i> 1993 |
| pTRV-RNA1   | pTRV encoding replicase, movement and cysteine-rich protein                                                          | Gao <i>et al.</i> 2011      |
| pYL156-RNA2 | TRV-based VIGS vector, Km <sup>r</sup>                                                                               | Gao <i>et al.</i> 2011      |

186

187 **Supplementary Table 4. Primers used in this study.**

188 **Cloning and mutation primers**

| Gene               | Forward Primer                        | Reverse Primer                            |
|--------------------|---------------------------------------|-------------------------------------------|
| <i>Avrb6</i>       | GGACTAGTATGGATCCCAT<br>TCGTTTCGCG     | GTCCCCCGGGCTGAGGCAATAGCT<br>CCATC         |
| <i>PthN</i>        | GGACTAGTATGGATCCCAT<br>TCGTTTCGCG     | GTCCCCCGGGCTGAGGCAATAGCT<br>CCCTC         |
| <i>GhSWEET10D</i>  | CGGGATCCATGGCTCTTCA<br>CTTGTCTTGGG    | GAAGGCCTAACTTTGTTGAAAGCA<br>TTCCCTTC      |
| <i>pGhSWEET10D</i> | CGGGATCCAAACCACATG<br>GTGGGTGACA      | CATGCCATGGCTTCCACGATCTGT<br>GAAGCA        |
| <i>pGh067700</i>   | CGGGATCCAGAGGGGCTG<br>ACAGAGGCCCTA    | CATGCCATGGTACGATCCGATCCC<br>CAGTAAAAACAAG |
| <i>pGhKBS1</i>     | CGGGATCCTTCCTTCCAAG<br>AGATGACAAGAGC  | CATGCCATGGAGAGATGTGAGCAG<br>AGAGGGA       |
| <i>pGhMDR1</i>     | CGGGATCCTCGCTCCCAA<br>AAACAATATAAATCA | CATGCCATGGGGACAGGACAGTGT<br>TGTGGT        |
| <i>pGhHLH1</i>     | CGGGATCCGTCATTCCAC<br>ATATCTCATCCCCA  | CATGCCATGGAAGGATGATTGGAT<br>GGTTTGATAGA   |
| <i>pGhSWEET10D</i> | CGTTTCCTCATCCCGGGCC                   | GAGGAGAACGGGCCCGGGATGAG                   |

|                           |                                           |                                    |
|---------------------------|-------------------------------------------|------------------------------------|
| <i>-mEBE</i>              | CGTTCTCCTC                                | GAAACG                             |
| VIGS-<br><i>GhSWEET10</i> | <u>GGAATTC</u> ACGGCCCAAAG<br>AAAGAAAAGAT | GGGGTACCAGGATGTTTGGAACGG<br>CGAC   |
| <i>pGaSWEET10</i>         | CGGGATCCAAACCACATG<br>GTGGGTGACA          | CATGCCATGGCTTCCACGATCTGT<br>GAAGCA |

189 Note: The restriction enzyme sites are underlined and start codon is italicized. For point mutation  
190 primers, the mutation sites are underlined.

191

192 **RT-PCR Primers**

| Gene             | Forward Primer         | Reverse Primer        |
|------------------|------------------------|-----------------------|
| <i>GhSWEET10</i> | ACGGCCCAAAGAAAGAAAAGAT | AGGATGTTTGGAACGGCGAC  |
| <i>Gh067700</i>  | TCACCAACCCTTTGCCTCAAT  | AAGGTCTTCATCACCGCCAA  |
| <i>GhKBS1</i>    | TCCAGCGAAGATCCCCAGTA   | GAACCCTTGACGTTTCGTGC  |
| <i>GhMDR1</i>    | CACCCTGGGTACTACATTGTCA | AGTGGCATTATCGCCACAA   |
| <i>GhHLH1</i>    | ACCAACCAACCAAGAAACACC  | CCCACCTGCTTTGTTGGAGT  |
| <i>GhACTIN</i>   | CCTCCGTCTAGACCTTGCTG   | TCATTCCGGTCAGCAATACCA |
| <i>GaACTIN</i>   | CCTCCGTCTAGACCTTGCTG   | TCATTCCGGTCAGCAATACCA |

193

194 **qRT-PCR Primers**

| Gene              | Forward Primer               | Reverse Primer              |
|-------------------|------------------------------|-----------------------------|
| <i>GhSWEET9a</i>  | CAGCCAGGATATACACGAC          | AAACTGAGAAGATGGCAC          |
| <i>GhSWEET10</i>  | GCCATTGTGAGAAAAGTC           | TGAAGTACTCCAAAGATG          |
| <i>GhSWEET11</i>  | GCATTCTGGGAAACGTTG           | ATCCAAAGCATCGCACTG          |
| <i>GhSWEET12a</i> | GCTATCGTGAGAAAGGTC           | ACCCTAGTATGTTTGGTC          |
| <i>GhSWEET12b</i> | CCTTGCCAACATTTTATC           | AGTAGCATAGCATCCTTC          |
| <i>GhSWEET14a</i> | ACCAGTGCCAACATTCTG           | ATCAACGCGTAATACAGC          |
| <i>GhSWEET14b</i> | GGTGTCTTAGGTAACATC           | AGCTGAACAATGCCACCTG         |
| <i>GhUBQ1</i>     | CTGAATCTTCGCTTTCACGTTA<br>TC | GGGATGCAAATCTTCGTGAAAA<br>C |

195

196
